# Supplementary material for: Antioxidant, Scavenging, Reducing, and Anti-Proliferative Activities of Selected Tropical Brown Seaweeds Confirm the Nutraceutical Potential of Spatoglossum asperum
Source: MDPI journal article supplement (doi:10.3390/foods10102482), 2021-10-17

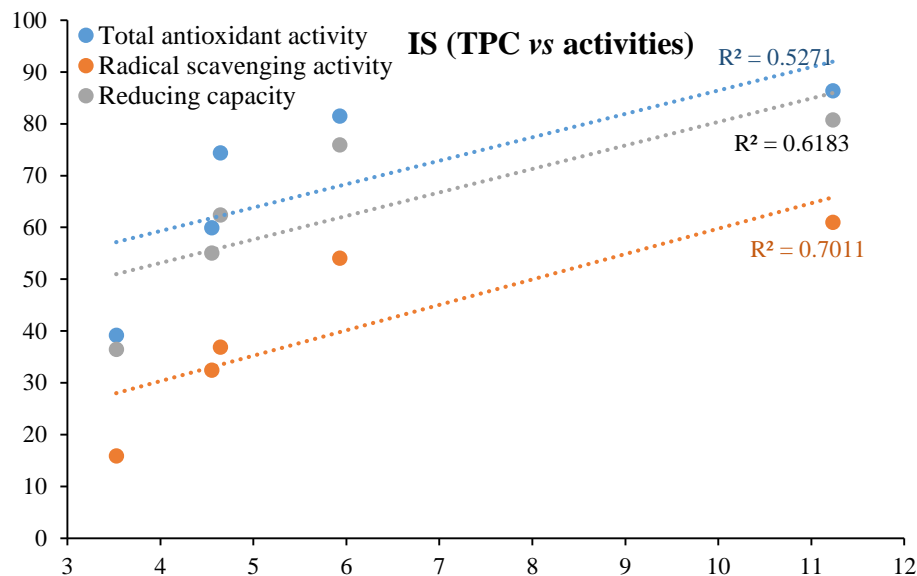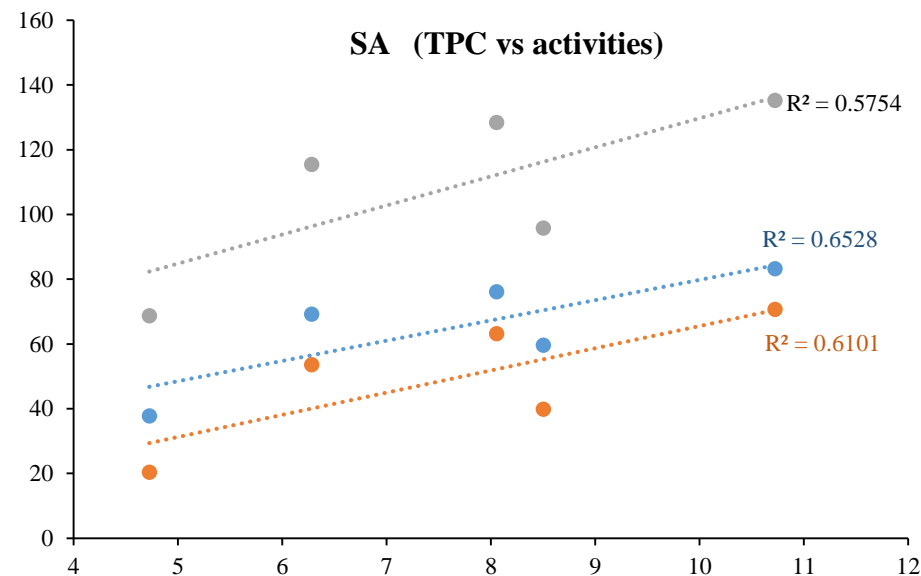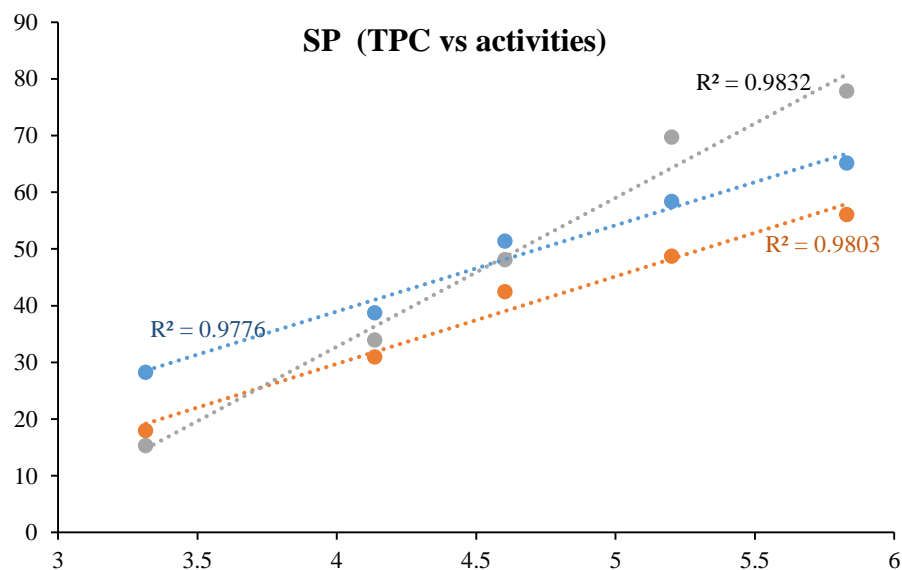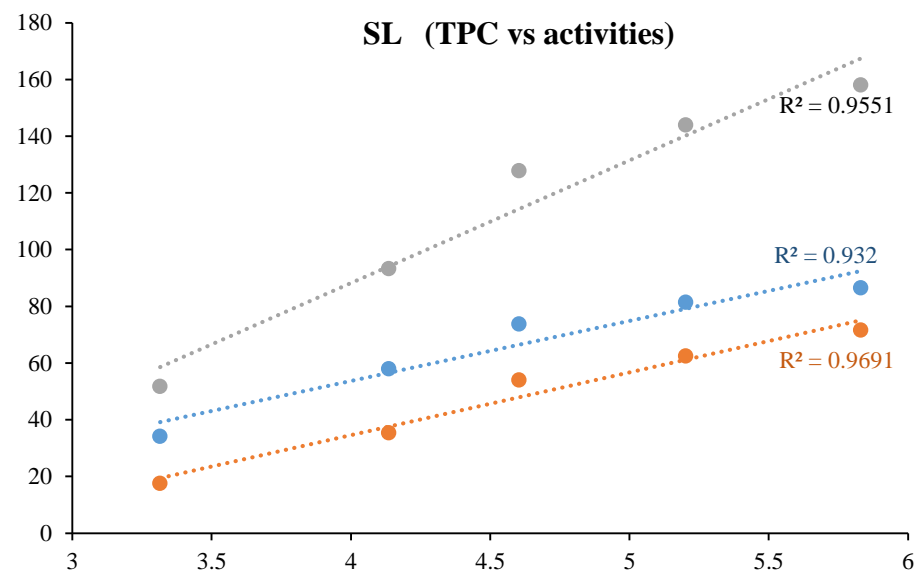

**Figure S1:** Correlation between different activities (total antioxidant, scavenging and reducing) and total phenolic contents (TPC) of the selected brown seaweeds. Dotted lines represent linear regression curves.

IS: *Iyengaria stellate*; SA: *Spatoglossum asperum*; SP: *Stoechospermum polypodioides*; SL: *Sargassum linearifolium*

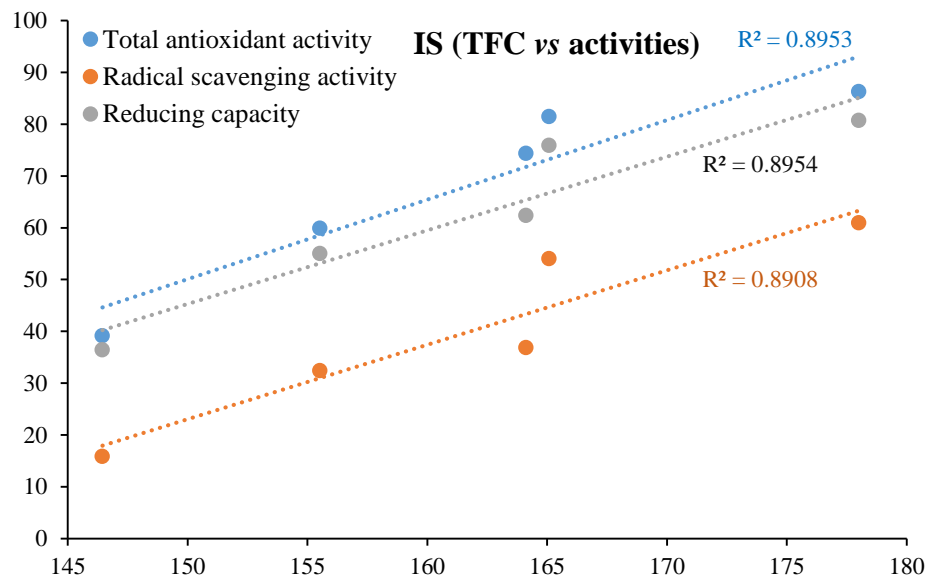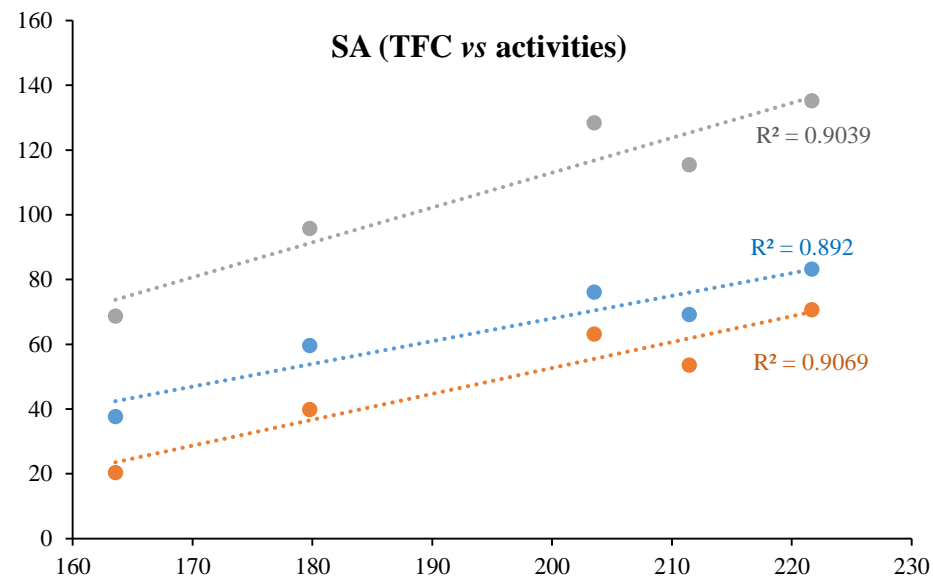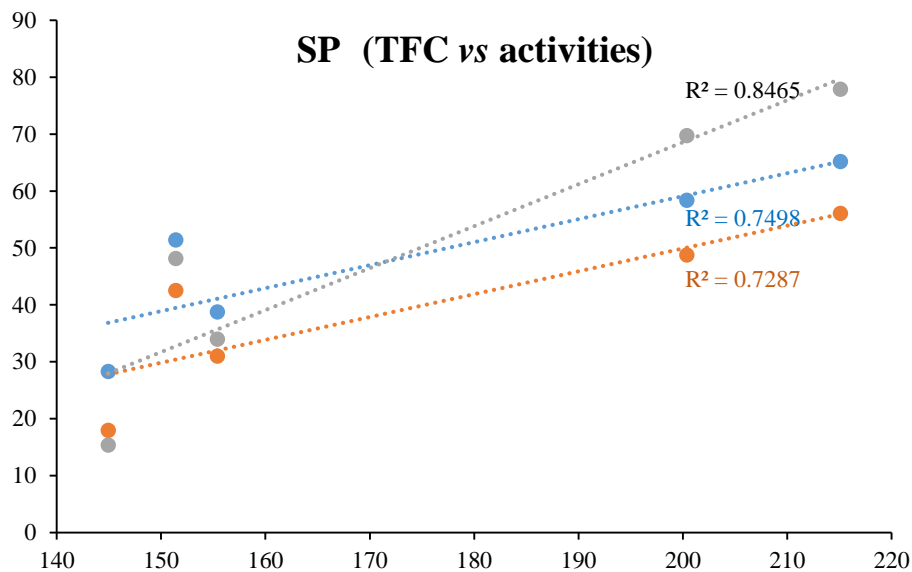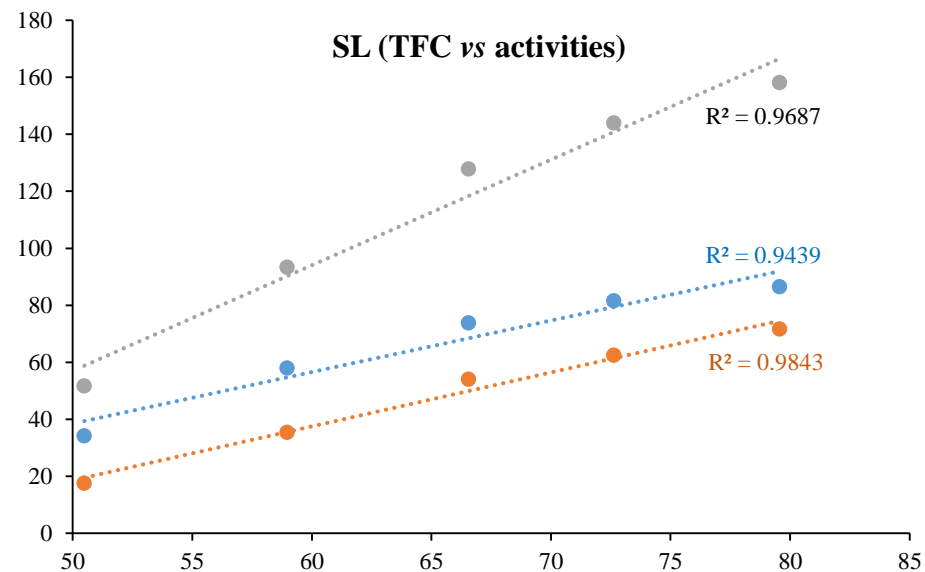

**Figure S2:** Correlation between different activities (total antioxidant, scavenging and reducing) and total flavonoid contents (TFC) of the selected brown seaweeds. Dotted lines represent linear regression curves.

IS: *Iyengaria stellate*; SA: *Spatoglossum asperum*; SP: *Stoechospermum polypodioides*; SL: *Sargassum linearifolium*

**Table S1:** Correlation matrix of different activities (total antioxidant, scavenging and reducing) and phenolic (TPC) and flavonoid (TFC) contents of the selected brown seaweeds.

***Iyengaria stellata (Børgesen) Børgesen***

Correlation matrix (Pearson):

| Variables | TPC          | ABTS         | DPPH         | RP           | TFC          |
|-----------|--------------|--------------|--------------|--------------|--------------|
| TPC       | <b>1</b>     | 0.726        | 0.837        | 0.786        | <b>0.892</b> |
| ABTS      | 0.726        | <b>1</b>     | <b>0.958</b> | <b>0.985</b> | <b>0.946</b> |
| DPPH      | 0.837        | <b>0.958</b> | <b>1</b>     | <b>0.992</b> | <b>0.944</b> |
| RP        | 0.786        | <b>0.985</b> | <b>0.992</b> | <b>1</b>     | <b>0.946</b> |
| TFC       | <b>0.892</b> | <b>0.946</b> | <b>0.944</b> | <b>0.946</b> | <b>1</b>     |

Values in bold are different with a significance level  $\alpha=0.05$

p-values (Pearson):

| Variables | TPC          | ABTS         | DPPH         | RP           | TFC          |
|-----------|--------------|--------------|--------------|--------------|--------------|
| TPC       | <b>0</b>     | 0.165        | 0.077        | 0.115        | <b>0.042</b> |
| ABTS      | 0.165        | <b>0</b>     | <b>0.010</b> | <b>0.002</b> | <b>0.015</b> |
| DPPH      | 0.077        | <b>0.010</b> | <b>0</b>     | <b>0.001</b> | <b>0.016</b> |
| RP        | 0.115        | <b>0.002</b> | <b>0.001</b> | <b>0</b>     | <b>0.015</b> |
| TFC       | <b>0.042</b> | <b>0.015</b> | <b>0.016</b> | <b>0.015</b> | <b>0</b>     |

Coefficients of determination (Pearson):

| Variables | TPC      | ABTS     | DPPH     | RP       | TFC      |
|-----------|----------|----------|----------|----------|----------|
| TPC       | <b>1</b> | 0.527    | 0.701    | 0.618    | 0.796    |
| ABTS      | 0.527    | <b>1</b> | 0.918    | 0.971    | 0.895    |
| DPPH      | 0.701    | 0.918    | <b>1</b> | 0.985    | 0.891    |
| RP        | 0.618    | 0.971    | 0.985    | <b>1</b> | 0.895    |
| TFC       | 0.796    | 0.895    | 0.891    | 0.895    | <b>1</b> |

***Spatoglossum asperum J.Agardh***

Correlation matrix (Pearson):

| Variables | TPC      | ABTS         | DPPH         | RP           | TFC          |
|-----------|----------|--------------|--------------|--------------|--------------|
| TPC       | <b>1</b> | 0.808        | 0.781        | 0.759        | 0.654        |
| ABTS      | 0.808    | <b>1</b>     | <b>0.994</b> | <b>0.994</b> | <b>0.944</b> |
| DPPH      | 0.781    | <b>0.994</b> | <b>1</b>     | <b>0.999</b> | <b>0.952</b> |
| RP        | 0.759    | <b>0.994</b> | <b>0.999</b> | <b>1</b>     | <b>0.951</b> |
| TFC       | 0.654    | <b>0.944</b> | <b>0.952</b> | <b>0.951</b> | <b>1</b>     |

Values in bold are different with a significance level  $\alpha=0.05$

p-values (Pearson):

| Variables | TPC      | ABTS         | DPPH               | RP                 | TFC          |
|-----------|----------|--------------|--------------------|--------------------|--------------|
| TPC       | <b>0</b> | 0.098        | 0.119              | 0.137              | 0.232        |
| ABTS      | 0.098    | <b>0</b>     | <b>0.000</b>       | <b>0.001</b>       | <b>0.016</b> |
| DPPH      | 0.119    | <b>0.000</b> | <b>0</b>           | <b>&lt; 0.0001</b> | <b>0.012</b> |
| RP        | 0.137    | <b>0.001</b> | <b>&lt; 0.0001</b> | <b>0</b>           | <b>0.013</b> |
| TFC       | 0.232    | <b>0.016</b> | <b>0.012</b>       | <b>0.013</b>       | <b>0</b>     |

Coefficients of determination (Pearson):

| Variables | TPC      | ABTS     | DPPH     | RP       | TFC      |
|-----------|----------|----------|----------|----------|----------|
| TPC       | <b>1</b> | 0.653    | 0.610    | 0.575    | 0.427    |
| ABTS      | 0.653    | <b>1</b> | 0.989    | 0.988    | 0.892    |
| DPPH      | 0.610    | 0.989    | <b>1</b> | 0.997    | 0.907    |
| RP        | 0.575    | 0.988    | 0.997    | <b>1</b> | 0.904    |
| TFC       | 0.427    | 0.892    | 0.907    | 0.904    | <b>1</b> |

***Stoechospermum polypodioides (J.V.Lamouroux) J.Agardh***

Correlation matrix (Pearson):

| Variables | TPC          | ABTS         | DPPH         | RP           | TFC          |
|-----------|--------------|--------------|--------------|--------------|--------------|
| TPC       | <b>1</b>     | <b>0.989</b> | <b>0.990</b> | <b>0.992</b> | <b>0.909</b> |
| ABTS      | <b>0.989</b> | <b>1</b>     | <b>0.998</b> | <b>0.990</b> | 0.866        |
| DPPH      | <b>0.990</b> | <b>0.998</b> | <b>1</b>     | <b>0.987</b> | 0.854        |
| RP        | <b>0.992</b> | <b>0.990</b> | <b>0.987</b> | <b>1</b>     | <b>0.920</b> |
| TFC       | <b>0.909</b> | 0.866        | 0.854        | <b>0.920</b> | <b>1</b>     |

Values in bold are different with a significance level  $\alpha=0.05$ 

p-values (Pearson):

| Variables | TPC          | ABTS         | DPPH         | RP           | TFC          |
|-----------|--------------|--------------|--------------|--------------|--------------|
| TPC       | <b>0</b>     | <b>0.001</b> | <b>0.001</b> | <b>0.001</b> | <b>0.032</b> |
| ABTS      | <b>0.001</b> | <b>0</b>     | <b>0.000</b> | <b>0.001</b> | 0.058        |
| DPPH      | <b>0.001</b> | <b>0.000</b> | <b>0</b>     | <b>0.002</b> | 0.066        |
| RP        | <b>0.001</b> | <b>0.001</b> | <b>0.002</b> | <b>0</b>     | <b>0.027</b> |
| TFC       | <b>0.032</b> | 0.058        | 0.066        | <b>0.027</b> | <b>0</b>     |

Coefficients of determination (Pearson):

| Variables | TPC      | ABTS     | DPPH     | RP       | TFC      |
|-----------|----------|----------|----------|----------|----------|
| TPC       | <b>1</b> | 0.978    | 0.980    | 0.983    | 0.827    |
| ABTS      | 0.978    | <b>1</b> | 0.996    | 0.980    | 0.750    |
| DPPH      | 0.980    | 0.996    | <b>1</b> | 0.974    | 0.729    |
| RP        | 0.983    | 0.980    | 0.974    | <b>1</b> | 0.846    |
| TFC       | 0.827    | 0.750    | 0.729    | 0.846    | <b>1</b> |

***Sargassum longifolium (Turner) C.Agardh***

Correlation matrix (Pearson):

| Variables | TPC          | ABTS         | DPPH         | RP           | TFC          |
|-----------|--------------|--------------|--------------|--------------|--------------|
| TPC       | <b>1</b>     | <b>0.965</b> | <b>0.984</b> | <b>0.977</b> | <b>0.998</b> |
| ABTS      | <b>0.965</b> | <b>1</b>     | <b>0.991</b> | <b>0.998</b> | <b>0.972</b> |
| DPPH      | <b>0.984</b> | <b>0.991</b> | <b>1</b>     | <b>0.998</b> | <b>0.992</b> |
| RP        | <b>0.977</b> | <b>0.998</b> | <b>0.998</b> | <b>1</b>     | <b>0.984</b> |
| TFC       | <b>0.998</b> | <b>0.972</b> | <b>0.992</b> | <b>0.984</b> | <b>1</b>     |

Values in bold are different with a significance level  $\alpha=0.05$ 

p-values (Pearson):

| Variables | TPC          | ABTS         | DPPH         | RP           | TFC          |
|-----------|--------------|--------------|--------------|--------------|--------------|
| TPC       | <b>0</b>     | <b>0.008</b> | <b>0.002</b> | <b>0.004</b> | <b>0.000</b> |
| ABTS      | <b>0.008</b> | <b>0</b>     | <b>0.001</b> | <b>0.000</b> | <b>0.006</b> |
| DPPH      | <b>0.002</b> | <b>0.001</b> | <b>0</b>     | <b>0.000</b> | <b>0.001</b> |
| RP        | <b>0.004</b> | <b>0.000</b> | <b>0.000</b> | <b>0</b>     | <b>0.002</b> |
| TFC       | <b>0.000</b> | <b>0.006</b> | <b>0.001</b> | <b>0.002</b> | <b>0</b>     |

Coefficients of determination (Pearson):

| Variables | TPC      | ABTS     | DPPH     | RP       | TFC      |
|-----------|----------|----------|----------|----------|----------|
| TPC       | <b>1</b> | 0.932    | 0.969    | 0.955    | 0.995    |
| ABTS      | 0.932    | <b>1</b> | 0.982    | 0.995    | 0.944    |
| DPPH      | 0.969    | 0.982    | <b>1</b> | 0.995    | 0.984    |
| RP        | 0.955    | 0.995    | 0.995    | <b>1</b> | 0.969    |
| TFC       | 0.995    | 0.944    | 0.984    | 0.969    | <b>1</b> |

**Table S2:** Metabolites identified from abundantly grown brown seaweeds by gas chromatography-mass spectrometry (GC-MS) analysis.

| Category      | Metabolites             | IS         | SA      | SP       | SL        |
|---------------|-------------------------|------------|---------|----------|-----------|
| Sugar         | 2-Deoxyribose           | nd         | nd      | 18 ± 5   | 2 ± 0.6   |
|               | 3- $\alpha$ -Mannobiose | nd         | nd      | nd       | 5 ± 1     |
|               | 4-Ketoglucose           | nd         | nd      | 37 ± 5   | 30 ± 1    |
|               | Erythrose               | nd         | 8 ± 3   | 5 ± 2    | 2 ± 0.1   |
|               | Fructose                | nd         | Nd      | 155 ± 81 | nd        |
|               | Galactofuranose         | nd         | 3 ± 0.5 | nd       | nd        |
|               | Galactose               | nd         | nd      | 12 ± 2   | 7 ± 1     |
|               | Glucose                 | nd         | nd      | nd       | 22 ± 3    |
|               | Lactose                 | nd         | 7 ± 1   | 165 ± 15 | 57 ± 7    |
|               | Maltose                 | nd         | nd      | 3 ± 0.4  | 3 ± 0.4   |
|               | Mannose                 | 9 ± 1      | nd      | nd       | 6 ± 1     |
|               | Myo-Inositol            | nd         | 12 ± 5  | 130 ± 4  | 30 ± 3    |
|               | N-Acetyl-glucosamine    | nd         | nd      | 2 ± 0.5  | nd        |
|               | Psicose                 | 8 ± 1      | nd      | 76 ± 17  | 19 ± 2    |
|               | Sucrose                 | nd         | 4 ± 1   | 506 ± 37 | 1097 ± 76 |
|               | Talose                  | nd         | nd      | 21 ± 10  | nd        |
|               | Threose                 | nd         | nd      | 3 ± 0.4  | nd        |
|               | Trehalose               | nd         | 8 ± 3   | 9 ± 1    | 31 ± 4    |
|               | Turanose                | 42 ± 7     | nd      | nd       | 17 ± 2    |
| Sugar acid    | Arabinonic acid         | nd         | nd      | 2 ± 0.2  | nd        |
|               | Galactaric acid         | nd         | nd      | nd       | 2 ± 0.4   |
|               | Glyceric acid           | 7 ± 1      | 5 ± 1   | nd       | nd        |
|               | Ribonic acid            | 8 ± 1      | 8 ± 6   | 3 ± 1.5  | 5 ± 1     |
|               | Threonic acid           | 110 ± 13   | 8 ± 2   | 5 ± 3    | 3 ± 0.2   |
| Sugar alcohol | Glucitol                | 7474 ± 886 | nd      | nd       | nd        |
|               | Mannitol                | nd         | 2 ± 0.1 | nd       | 12 ± 2    |
|               | meso-Erythritol         | 453 ± 46   | 3 ± 0.1 | nd       | nd        |
|               | Scyllo-Inositol         | 153 ± 17   | 7 ± 1   | 2 ± 0.4  | nd        |
|               | Sorbitol                | 10 ± 2     | nd      | nd       | nd        |
| Amino acid    | 2-Methylalanine         | 8 ± 1      | nd      | nd       | nd        |
|               | Alanine                 | nd         | 2 ± 0.5 | nd       | nd        |
|               | Aspartic acid           | 24 ± 3     | 6 ± 2   | nd       | nd        |
|               | beta-Alanine            | nd         | nd      | 2 ± 0.2  | nd        |
|               | Glutamic acid           | 109 ± 11   | nd      | nd       | nd        |
|               | Glutamine               | 7 ± 1      | nd      | nd       | nd        |
|               | Glycine                 | 13 ± 1     | 6 ± 0.5 | 20 ± 1   | 7 ± 0.4   |
|               | Leucine                 | 8 ± 1      | nd      | nd       | nd        |
|               | Lysine                  | 6 ± 1      | nd      | nd       | nd        |
|               | Phenylalanine           | 10 ± 1     | nd      | nd       | nd        |
|               | Proline                 | 110 ± 19   | nd      | 3 ± 1.5  | nd        |
|               | Serine                  | 8 ± 1      | nd      | nd       | nd        |
|               | Threonine               | 7 ± 1      | 2 ± 0.3 | nd       | nd        |
|               | Valine                  | 19 ± 2     | nd      | nd       | nd        |
| Fatty acid    | 9-Octadecenoic acid     | nd         | 1 ± 0.1 | nd       | nd        |
|               | Butanoic acid           | 147 ± 14   | nd      | 2 ± 0.2  | nd        |
|               | Myristic acid           | nd         | 3 ± 1   | nd       | nd        |
|               | Palmitic Acid           | 51 ± 6     | 18 ± 6  | 6 ± 1    | nd        |
|               | Pentanoic acid          | nd         | 3 ± 1   | 3 ± 0.2  | nd        |
|               | Stearic acid            | 5 ± 2      | 6 ± 2   | 1 ± 0.1  | nd        |

|                  |                             |        |          |          |         |
|------------------|-----------------------------|--------|----------|----------|---------|
| Fatty nitrile    | Oleanitrile                 | nd     | 2 ± 0.4  | nd       | nd      |
| Organic acid     | Citric acid                 | 7 ± 1  | 4 ± 2    | nd       | nd      |
|                  | Lactic Acid                 | nd     | 261 ± 87 | 29 ± 5   | 38 ± 3  |
| Organic compound | Bis(2-ethylhexyl) phthalate | nd     | 388 ± 69 | 351 ± 45 | 395 ± 6 |
|                  | 1,3,5-Benzetriol            | 17 ± 1 | nd       | nd       | nd      |
|                  | 1,3-Propanediol             | nd     | 5 ± 1    |          | 4 ± 0.2 |
|                  | Ethanolamine                | 6 ± 1  | 19 ± 6   | 15 ± 2   | 7 ± 0.2 |
|                  | Oxalic acid                 | nd     | 15 ± 9   | 6 ± 1    | 6 ± 1   |
|                  | Succinic anhydride          | nd     | nd       | 4 ± 2    | nd      |
| Carboxylic acid  | Cyclohexaneacetic acid      | nd     | 2 ± 0.6  | nd       | nd      |
|                  | Butanedioic acid            | nd     | 14 ± 3   | 3 ± 0.4  | nd      |
|                  | Gluconic acid               | nd     | 4 ± 2    | nd       | 3 ± 0.5 |
|                  | Malic acid                  | 5 ± 1  | nd       | nd       | nd      |
|                  | Propanedioic acid           | nd     | 2 ± 1    | nd       | nd      |
|                  | Tartronic acid              | nd     | nd       | nd       | 2 ± 0.3 |
| Uronic acid      | D-Glucuronic acid           | 45 ± 6 | nd       | nd       | nd      |
| Polyol comp.     | Glycerol                    | nd     | 81 ± 18  | 57 ± 10  | 51 ± 4  |
|                  | Pinitol                     | nd     | nd       | 4 ± 1    | nd      |
| Diterpenoids     | Dehydroabietic acid         | nd     | 4 ± 1    | nd       | nd      |

Metabolite content is shown as  $\mu\text{g g}^{-1}$  DW of seaweed following latest rule of expressing data (<http://web.ics.purdue.edu/~lewicki/physics218/significant>)

DW: Dry Weight; 'nd': not detected

IS: *Iyengaria stellata*; SA: *Spatoglossum asperum*; SP: *Stoechospermum polypodioides*; SL: *Sargassum longifolium*

**Table S3:** Correlation matrix plots for PCA analysis of different activities (total antioxidant, scavenging, reducing and anti-proliferative) and contents (TPC and TFC) of the selected brown seaweeds.

**Correlation matrix (Pearson):**

| Variables   | Antioxidant | Scavenging    | Reducing | TPC           | TFC      | AP-HeLa  | AP-Huh   |
|-------------|-------------|---------------|----------|---------------|----------|----------|----------|
| Antioxidant | <b>1</b>    | 0.629         | 0.401    | -0.682        | 0.163    | -0.397   | 0.924    |
| Scavenging  | 0.629       | <b>1</b>      | 0.930    | <b>-0.989</b> | 0.320    | -0.822   | 0.299    |
| Reducing    | 0.401       | 0.930         | <b>1</b> | -0.937        | 0.042    | -0.646   | 0.019    |
| TPC         | -0.682      | <b>-0.989</b> | -0.937   | <b>1</b>      | -0.195   | 0.733    | -0.354   |
| TFC         | 0.163       | 0.320         | 0.042    | -0.195        | <b>1</b> | -0.789   | 0.169    |
| AP-HeLa     | -0.397      | -0.822        | -0.646   | 0.733         | -0.789   | <b>1</b> | -0.170   |
| AP-Huh      | 0.924       | 0.299         | 0.019    | -0.354        | 0.169    | -0.170   | <b>1</b> |

*Values in bold are different with a significance level  $\alpha=0.05$*

**p-values (Pearson):**

| Variables   | Antioxidant | Scavenging   | Reducing | TPC          | TFC      | AP-HeLa  | AP-Huh   |
|-------------|-------------|--------------|----------|--------------|----------|----------|----------|
| Antioxidant | <b>0</b>    | 0.371        | 0.599    | 0.318        | 0.837    | 0.603    | 0.076    |
| Scavenging  | 0.371       | <b>0</b>     | 0.070    | <b>0.011</b> | 0.680    | 0.178    | 0.701    |
| Reducing    | 0.599       | 0.070        | <b>0</b> | 0.063        | 0.958    | 0.354    | 0.981    |
| TPC         | 0.318       | <b>0.011</b> | 0.063    | <b>0</b>     | 0.805    | 0.267    | 0.646    |
| TFC         | 0.837       | 0.680        | 0.958    | 0.805        | <b>0</b> | 0.211    | 0.831    |
| AP-HeLa     | 0.603       | 0.178        | 0.354    | 0.267        | 0.211    | <b>0</b> | 0.830    |
| AP-Huh      | 0.076       | 0.701        | 0.981    | 0.646        | 0.831    | 0.830    | <b>0</b> |

**Coefficients of determination (Pearson):**

| Variables   | Antioxidant | Scavenging | Reducing | TPC      | TFC      | AP-HeLa  | AP-Huh   |
|-------------|-------------|------------|----------|----------|----------|----------|----------|
| Antioxidant | <b>1</b>    | 0.395      | 0.161    | 0.466    | 0.027    | 0.158    | 0.853    |
| Scavenging  | 0.395       | <b>1</b>   | 0.865    | 0.978    | 0.102    | 0.675    | 0.089    |
| Reducing    | 0.161       | 0.865      | <b>1</b> | 0.877    | 0.002    | 0.417    | 0.000    |
| TPC         | 0.466       | 0.978      | 0.877    | <b>1</b> | 0.038    | 0.537    | 0.125    |
| TFC         | 0.027       | 0.102      | 0.002    | 0.038    | <b>1</b> | 0.623    | 0.029    |
| AP-HeLa     | 0.158       | 0.675      | 0.417    | 0.537    | 0.623    | <b>1</b> | 0.029    |
| AP-Huh      | 0.853       | 0.089      | 0.000    | 0.125    | 0.029    | 0.029    | <b>1</b> |

AP: Anti-proliferative activity on HeLa/ Huh-7 cell lines

Scatter plots:

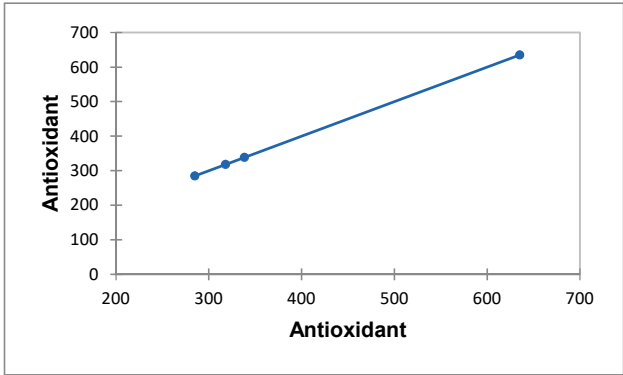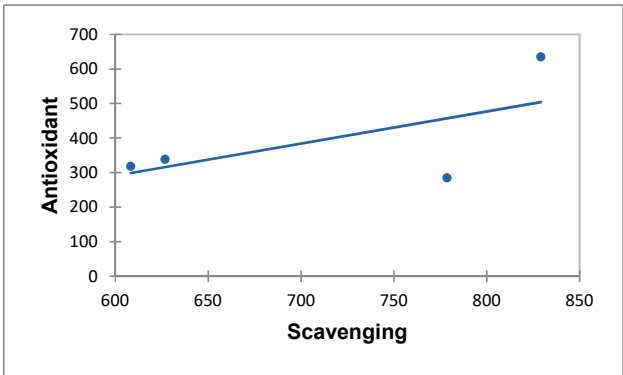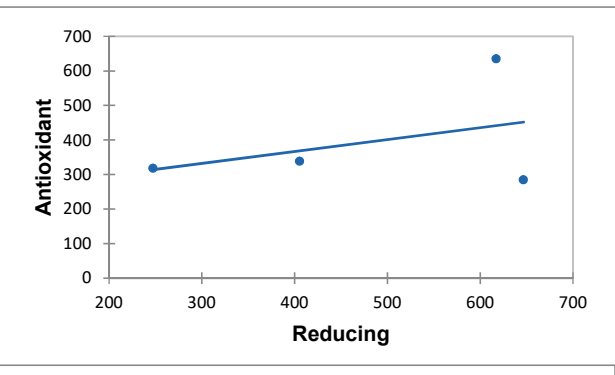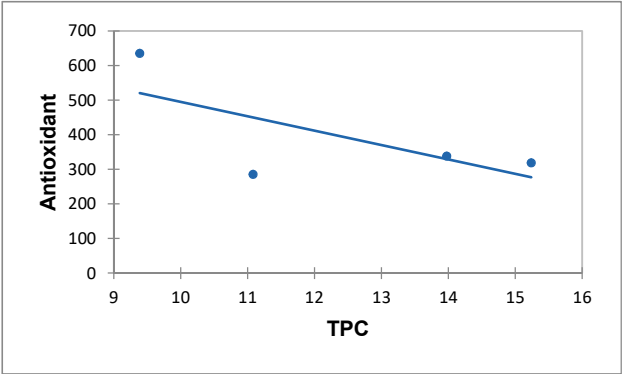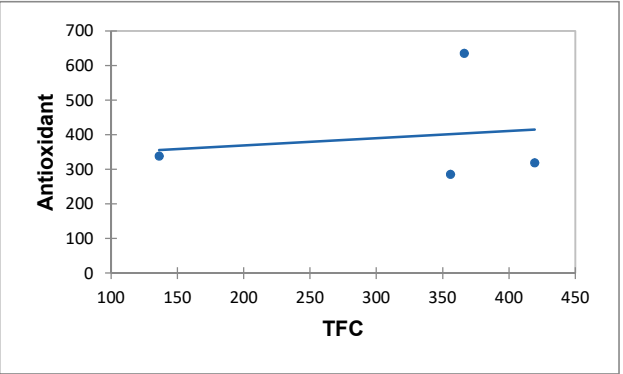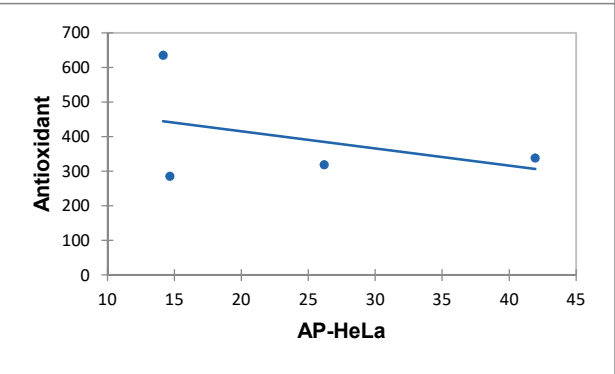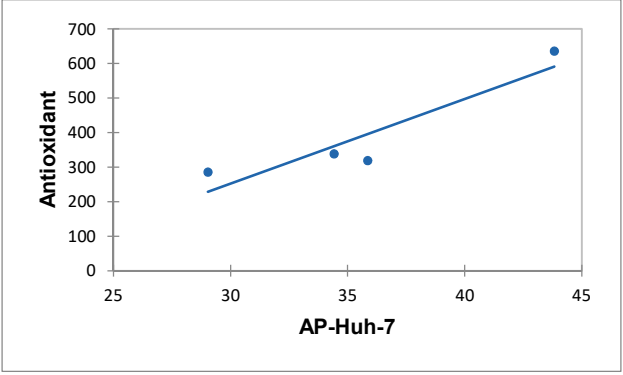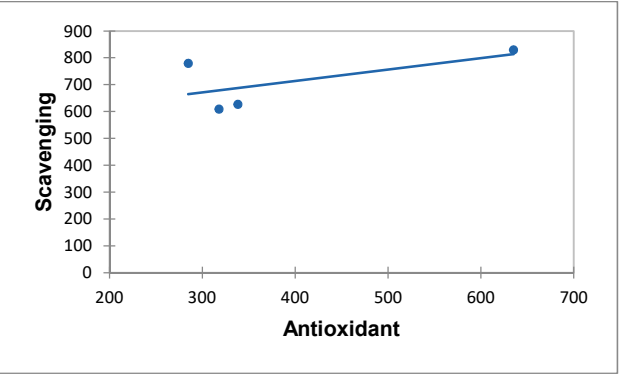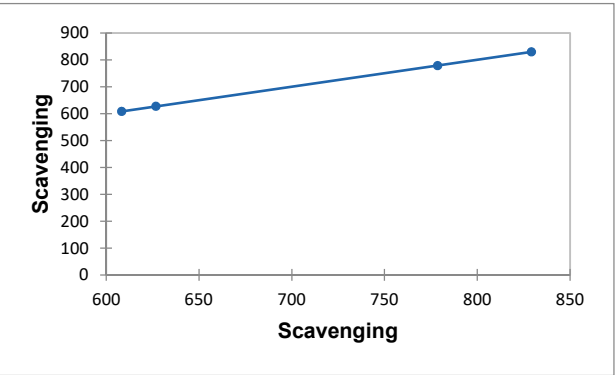

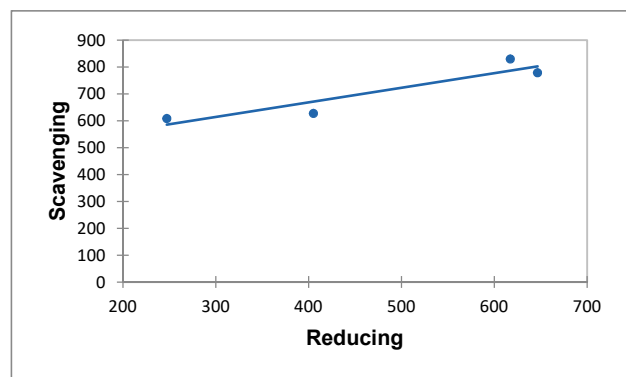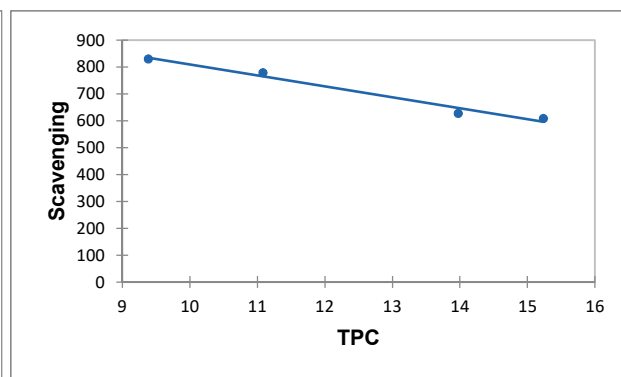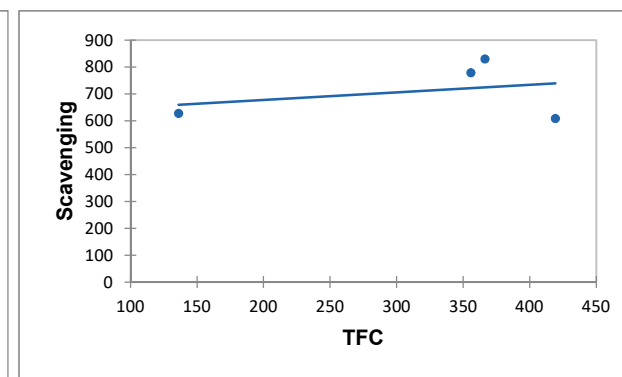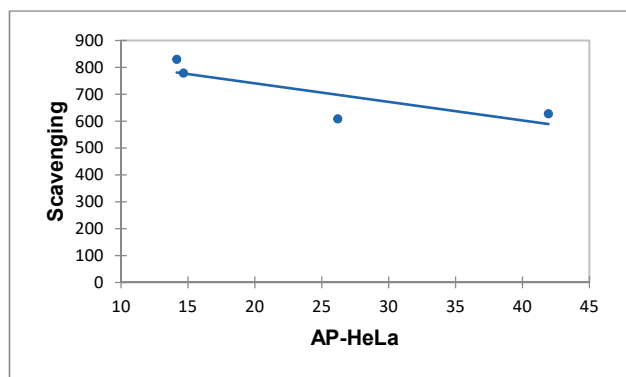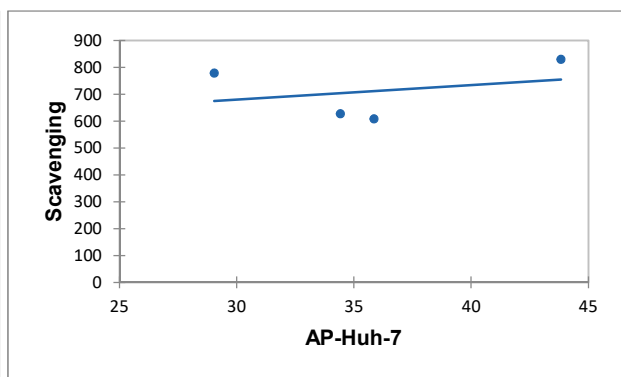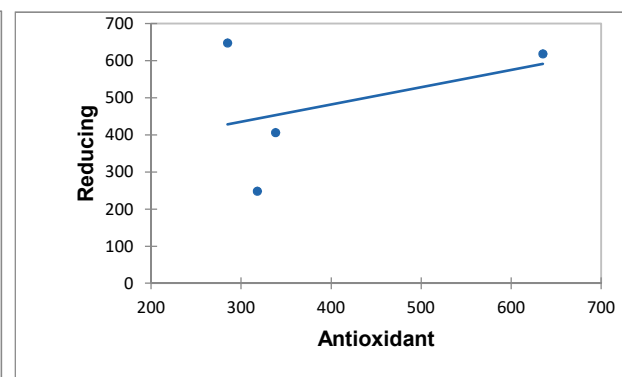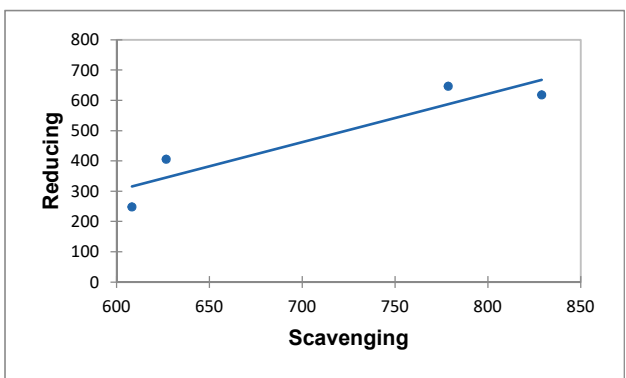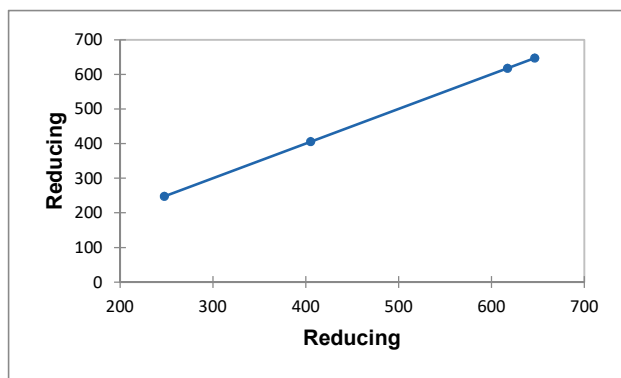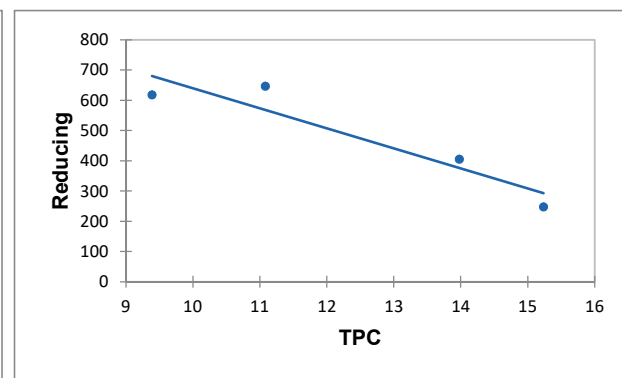

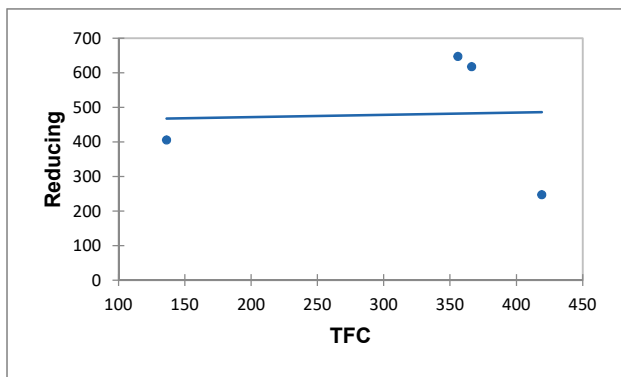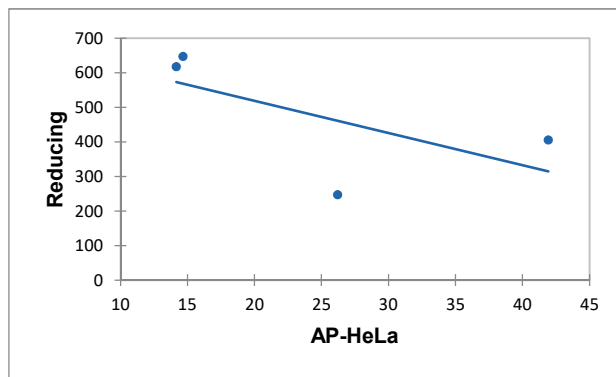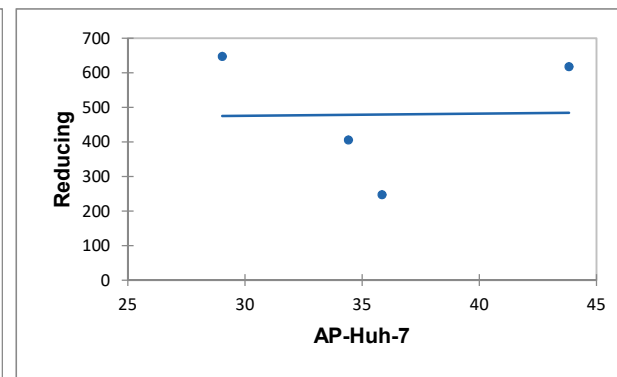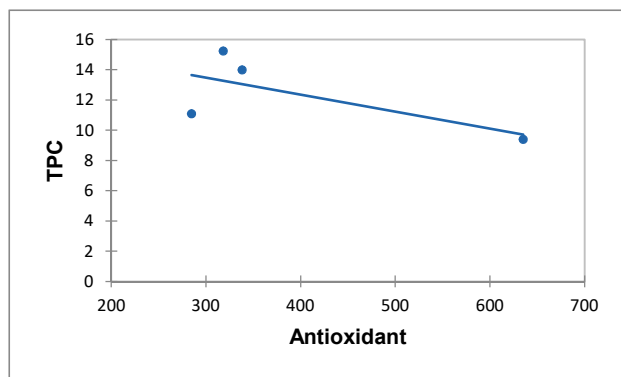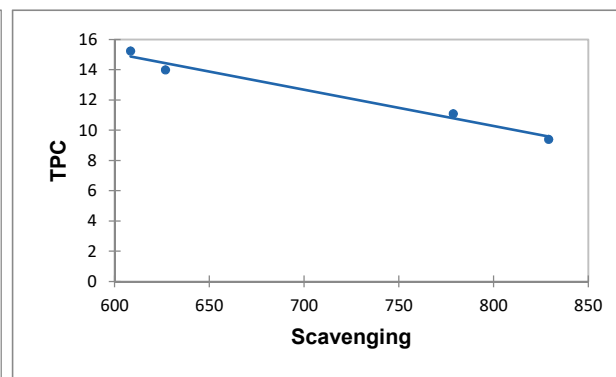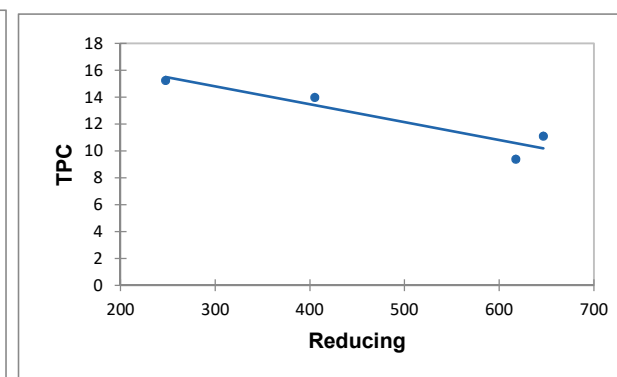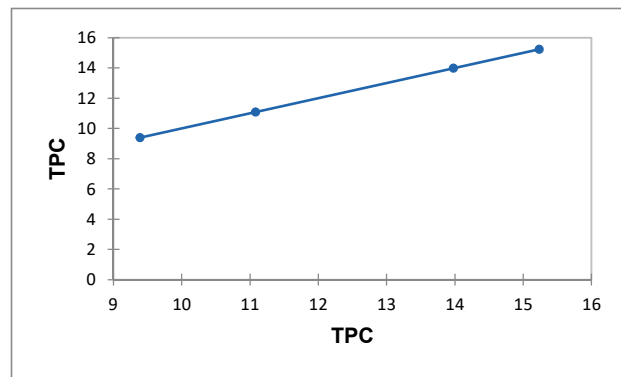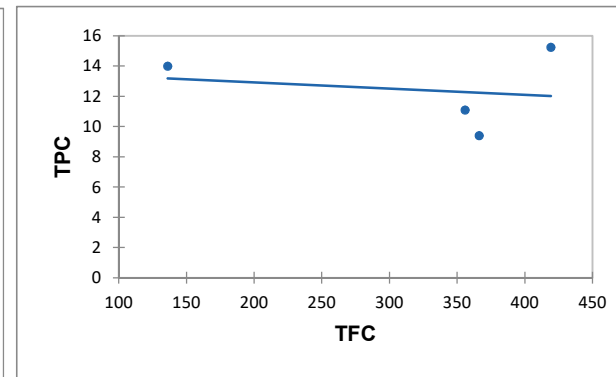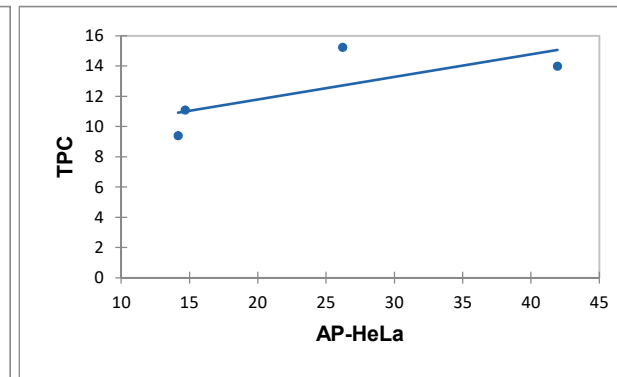

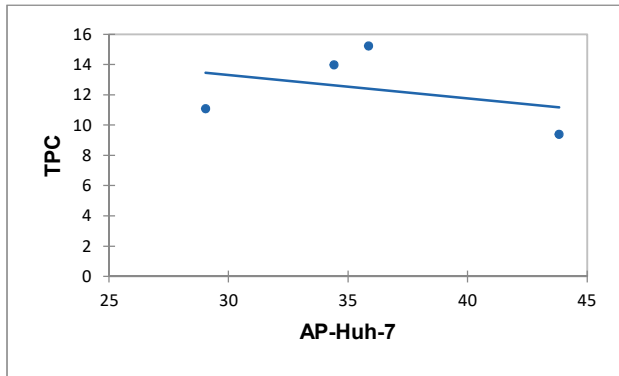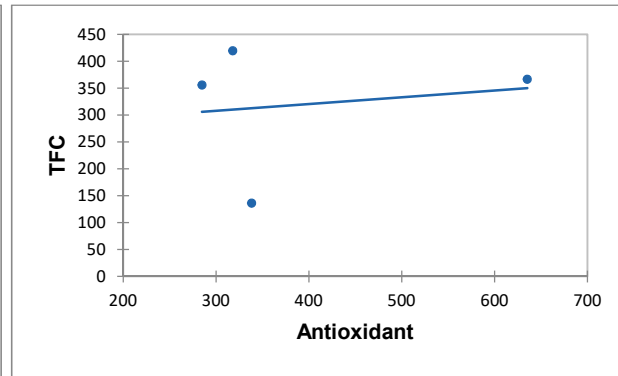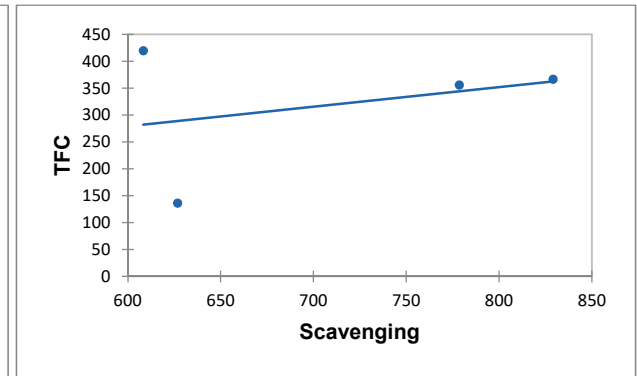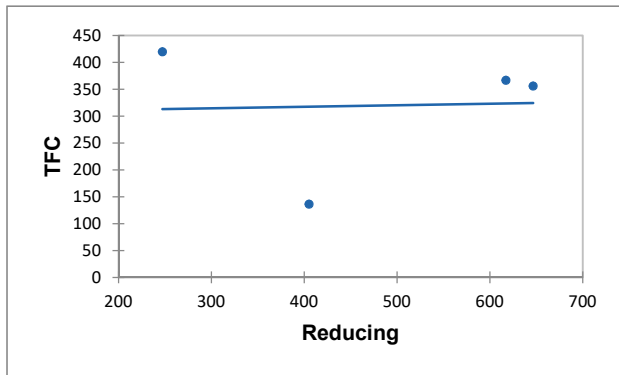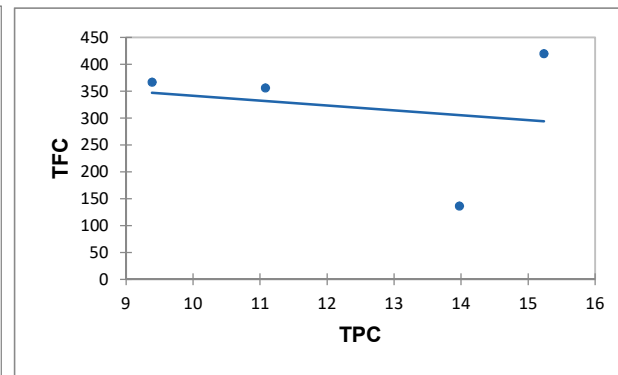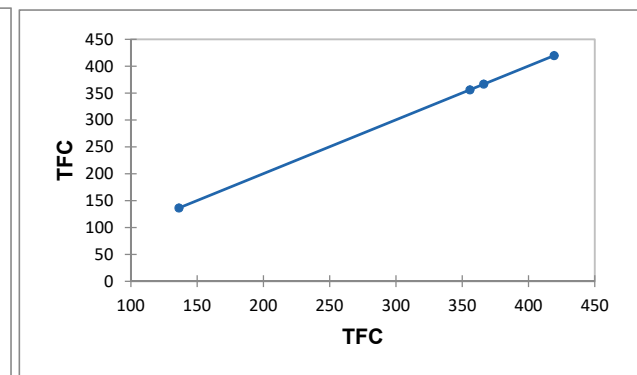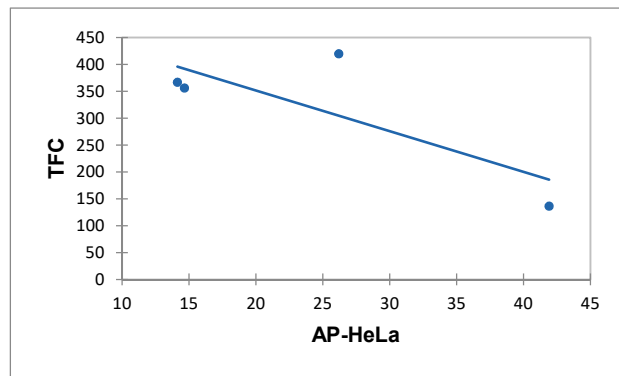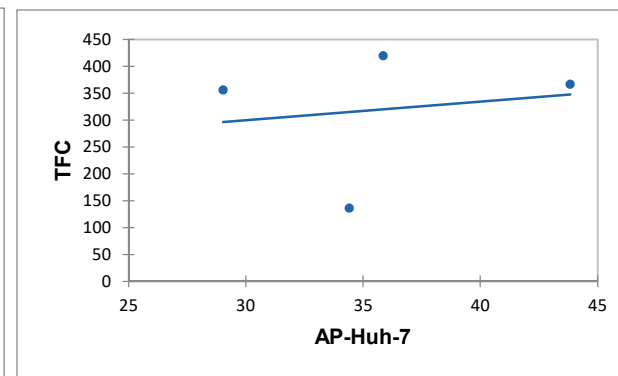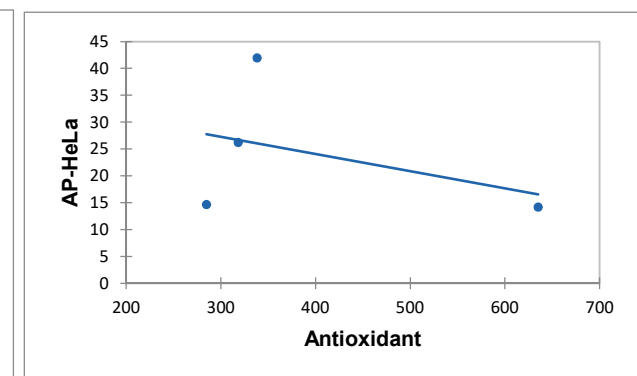

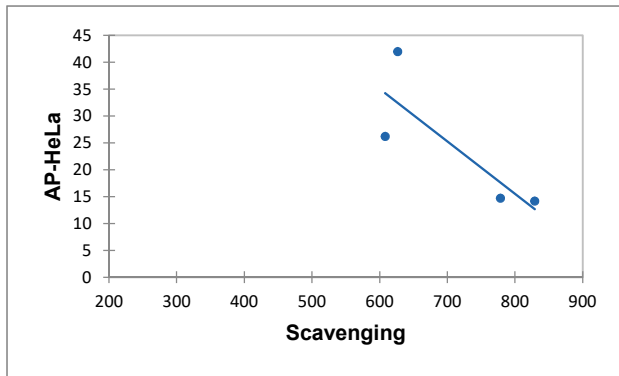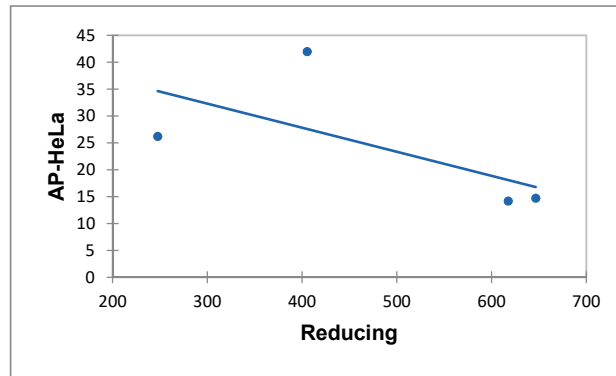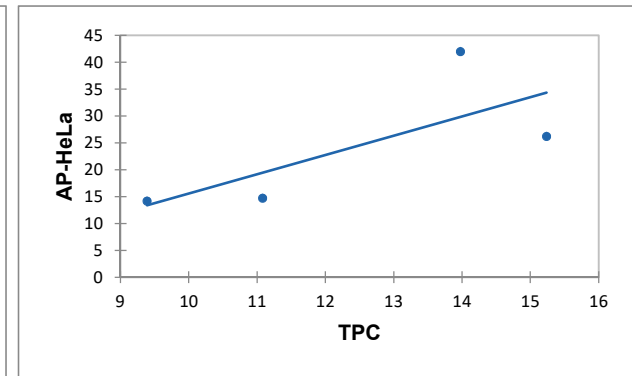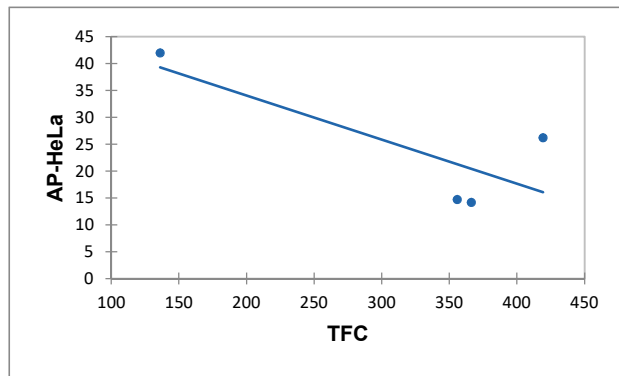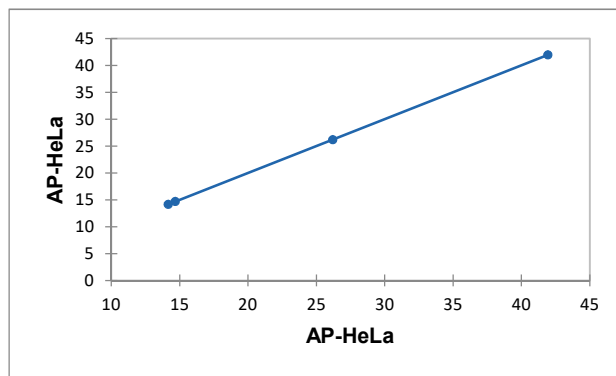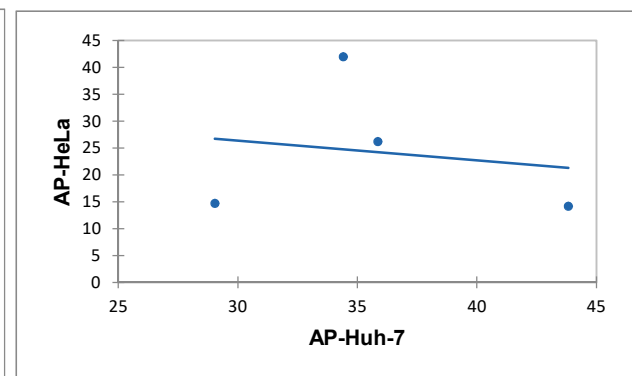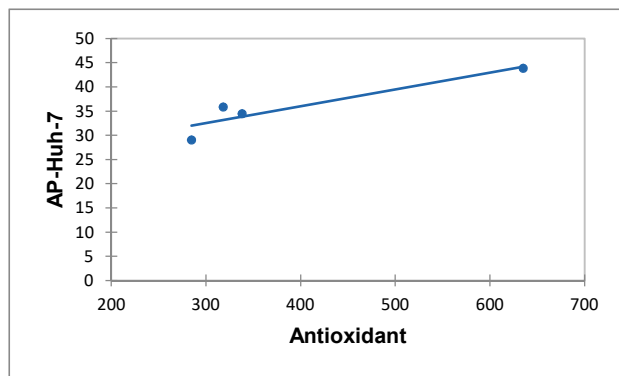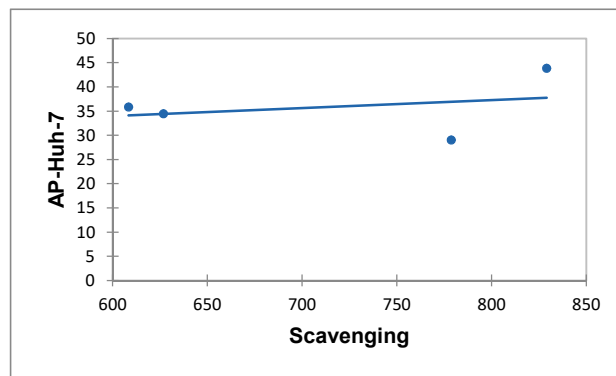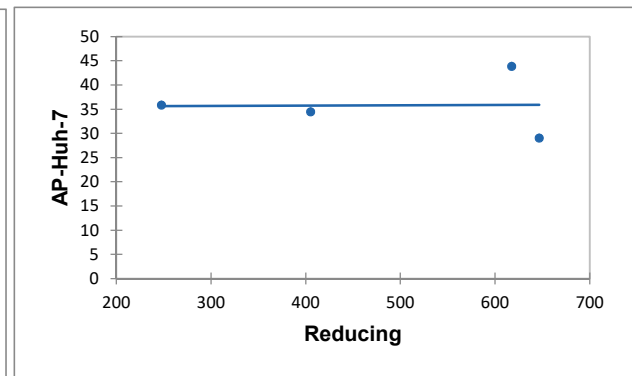

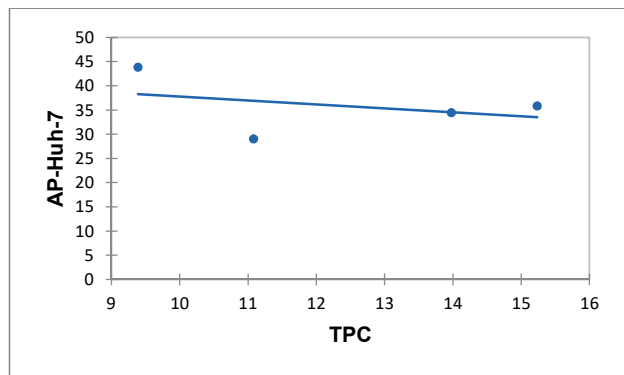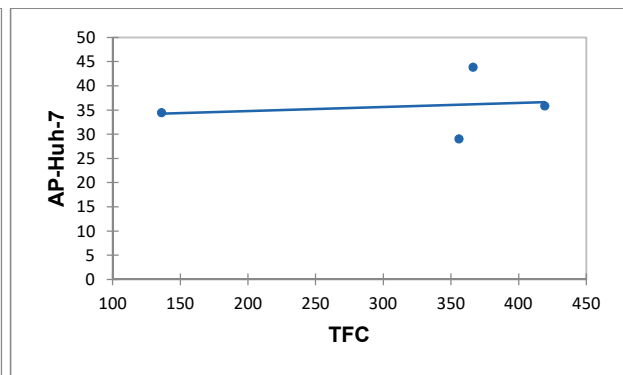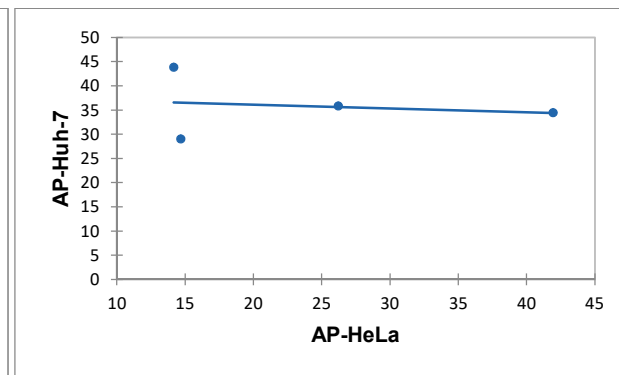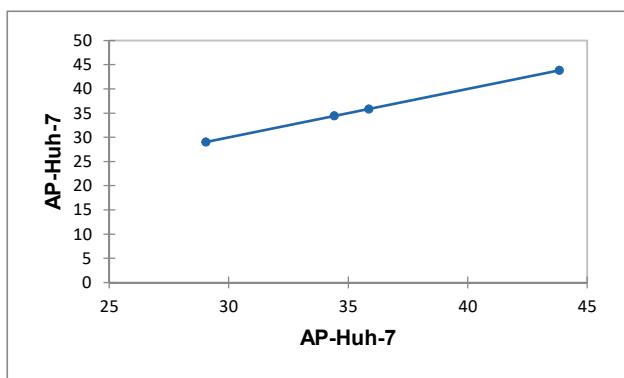

Supplement: s1 [file s1]
